# Supplementary material for: Lethal and sublethal effects of flubendiamide and spirotetramat against the leaf worm, Spodoptera litura(Fabricius) under laboratory conditions
Source: PeerJ. 2023 Aug 14;11:e15745. doi: 10.7717/peerj.15745 (PMC10434074; doi:10.7717/peerj.15745)
Supplement: Supplemental Information 1 [file peerj-11-15745-s001.xlsx]

## Sheet: Spiro
				SPIROTETRAMET
	LC10							LC25						LC50
Date	No. of egg batches	No. of eggs	Hatched larvae				Date	No. of egg batches	No. of eggs	Hatched larvae
1	7	482	55				1	12	3510	530				Females= 0
2	8	840	80				2	4	401	17				Males= 0
3	6	402	25				3	12	1115	100
4	11	1482	45				4	2	262	6
5	4	442	35				5	3	74	2
SUM	36	3648	240				6	8	1099	77
SD		455.422					7	2	310	12
SE		75.9036	6.57895				SUM	43	6771	744
							SD		1193.92
							SE		182.071	10.988
									%HATCHING= 10.99%
		%HATCHING= 6.57%
								Females= 7
								Males= 4
	Females= 8
	Males= 7
