# Supplementary material for: Lethal and sublethal effects of flubendiamide and spirotetramat against the leaf worm, Spodoptera litura(Fabricius) under laboratory conditions
Source: PeerJ. 2023 Aug 14;11:e15745. doi: 10.7717/peerj.15745 (PMC10434074; doi:10.7717/peerj.15745)
Supplement: Supplemental Information 2 [file peerj-11-15745-s002.xlsx]

## Sheet: CTRL larval data Spiro
NO	1st instar	2nd instar	3rd instar	4th instar	5th instar	6th instar	pre pupa	pupae	Adult
										CONTROL
1	2	3	2	2	5	2	1	8	7
2	2	3	2	5	4	2	2	4
3	3	3	2	2	5	2	1	9	10
4	2	3	2	6	3	3	1	6	10
5	3	2	2	3	4	2	2	10	8
6	3	2	2	2
7	3	2	3	2	5	2	1	19
8	3	2	1
9	3	3	2	2	5	4	1	13	5
10	3	2	3	5	4	3	1	11
11	2	2	3	2	3	3	1	9
12	3	2	3	2	3	3	2	9
13	3	4	3	4	3	3	1	6	6
14	2	3	3	2	5	4	1	16
15	3	5	1	2	5	1	1	9
16	3	2	3	3
17	3	2	3	3	5	1	1	9	8
18	3	2	3	3	3	3	2	8	8
19	3	2	3	2	5	2	1	8	6
20	2	3	2	2	5	2	1	9	6
21	3	2	3	2	5	2	1	9	8
22	2	2	3	2	5	2	1	9	10
23	2	3	2	3	4	2	1	9	10
24	3	2	3	3	4	2	1	9	9
25	3	3	2	2	5	2	1	19
26	3	2	2	2	5	2	1	10
27	3	4	1	2	6	1	1	14	5
28	3	2	3	2	4	3	1	7
29	2	2	2	4	5	4	1	6	10
30	3	3	2	3	5
31	3	2	2	3	4	3	1	8	5
32	3	2	3	3	4	2	1	9	9
33	3	2	2	3	3	4	1	8	5
34	3	2	2	3	5	2	2
35	3	2	2	4	5	1	1	9	10
36	2	3
37	3	2	3	3	5	2	1	8	9
38	3	3	3	5	3	3	1	6	11
39	3	3	1	3	6	1	1	8	11
40	3	3	2	2	6	1	1	14	5
SUM	110	101	91	108	161	81	40	325	191
AVE	2.75	2.525	2.275	2.7	4.025	2.025	1	8.125	4.775	30.2
SD	0.438529	0.715667	0.662266	1.05334	0.909823	0.900047	0.355036	3.40402	2.11576	10.5545
SE	0.0693375	0.113157	0.104713	0.166548	0.143856	0.14231	0.0561361	0.538223	0.334531	1.66881

## Sheet: LC10 larval data Spiro
No.	1st instar	2nd instar	3rd instar	4th instar	5th instar	6th instar	pre pupa	pupae	Adult	LC10 spiro
1	3	3	1	3	4	3	2	8	10
2	3	2	3	2	4	3	1	9	10
3	3	2	3
4	3	2	3	3	5	2	1	8	10
5	3	3
6	3	2	4	5	3	3	1	6	9
7	3	3	2	3	6	4	1	10	5
8	3	2	3
9	3	2	2	4	7	5	2	12
10	3	2	1	3	7	3	1	16
11	3	2	1	3	5	2	1	10	8
12	3	2	3	2	6	2	1	12	10
13	3	2	3	4	5	3	1	6
14	3	2	1
15	3	2	2	2
16	3	2	1	2
17	3	4
18	2	3
19	3	3	3	5	3	3	1	6	9
20	3	3	2	6	2	3	2	10
21	3	3	3	1
22	3	2	3
23	3	2	2	4	5	3	1	7	8
24	3	2	3
25	3	3
26	2	2	3	3	6	2	1	7	10
27	2	2	2	2	2	4	1	9	12
28	3	2	3	2	6	5	1	5	6
29	3	3	1	3	5	5	1	6	10
30	2	3	1	4	5	2
31	3	2	3	2	4	2	2	9	9
32	3	2	3
33	3	2	3
34	3	2	1
35	3	4
36	3	3	1
37	3	3	2	3	5	3	1	7	10
38	3	2	3	3	4	3	1	18
39	3	4	3	7	6	2	2	10
40	3	3	2	2
SUM	116	99	80	83	105	67	26	191	136
AVE	2.9	2.475	2	2.075	2.625	1.675	0.65	4.775	3.4	22.575
SD	0.303822	0.640012	0.893487	1.3862	1.41192	0.998917	0.436436	3.30007	1.75119	11.122
SE	0.0480384	0.101195	0.141273	0.219177	0.223244	0.157943	0.0690066	0.521787	0.276887	1.75855

## Sheet: LC25 larval data Spiro
No	1st instar	2nd instar	3rd instar	4th instar	5th instar	6th instar	pre pupa	pupae	Adult	LC 25 Spiro
1	2	2	3
2	2	2	4
3	3	2	2	3	5	1	1	9	9
4	3	2	2	2	5	2	2	9	10
5	3	2	3
6	3	2	4	6	2	6	1	10	5
7	3	2	2
8	3	2	3
9	3	2	3	4	5	4	1	10	5
10	2	2	3
11	2	4	1
12	3	2	2
13	3	2	3	5	4	3	1	6	6
14	3	2	3
15	3	5
16	3	4
17	3	3	1	1
18	3	2	1	4	2
19	3	5
20	3	2	3
21	3	2	3
22	3	2	3
23	3	2	2
24	3	2	1
25	3	2	1
26	3	2
27	3	5	2	6	3	3	1	14
28	2	5	2	4	3		1	6	9
29	2	2	3
30	3	2	2
31	3	2	2	2	7	1	2	8	10
32	3	2	3
33	2	2	4	2	5	3	1
34	3	2	4	2	5	2	2	7	10
35	3	2	3	3	5	2	1	8	6
36	3	2	2	3	5	2	1	8	10
37	3	3	2
38	3	3	2	1
39	3	2	3
40	3	2	1	3	7	2	1	8	10
SUM	113	99	88	51	63	31	16	103	90
AVE	2.825	2.475	2.2	1.275	1.575	0.775	0.4	2.575	2.25	16.35
SD	0.384808	0.986771	0.908514	1.55858	1.55662	1.37895	0.438529	2.15146	2.18258	11.5468
SE	0.0608434	0.156022	0.143649	0.246433	0.246124	0.218032	0.0693375	0.340176	0.345096	1.82571

## Sheet: LC50 larval data Spiro
NO	1st instar	2nd instar	3rd instar	4th instar	5th instar	6th instar	pre pupa	pupae	Adult	LC50 Spiro
1	3	2	3	1
2	3	2	3
3	3	2	2
4	3	2	3
5	3	2	2
6	3	2	2
7	2	2	2
8	3	2	2
9	3	2	3	1
10	3	2	3
11	3	2	2
12	3	2
13	3	2	3
14	3	2
15	3	2	2
16	3	2	2
17	2	2	5
18	2	2	1	1
19	2	2	2
20	3	2	2
21	2	3	2
22	2	3	3
23	3	2	2	1
24	2	2	2
25	3	2	2
26	3	2	2
27	3	2	2
28	3	2
29	2	4
30	3	3
31	3	2
32	3	2	1	1
33	3	2
34	3	2	2
35	3	2	3
36	3	2
37	3	2	2
38	3	2	3
39	3	2
40	3	2	3
SUM	112	85	73	5
AVE	2.8	2.125	1.825	0.125						6.875
SD	0.405096	0.404304	0.754912	0						1.56431
SE	0.0640513	0.063926	0.119362	0						0.247339

## Sheet: LC10 larval data Fluben
NO	1st instar	2nd instar	3rd instar	4th instar	5th instar	6th instar	pre pupa	pupae	Adults	LC10 Fluben
1	3	2	2
2	3	2
3	3	2	2
4	3	2	3
5	2	2	1
6	3	2	1
7	3	4	2	5	6	2	1	10	8
8	3	4
9	3	2
10	3	4
11	3	4	1
12	3	4	1
13	3	2	4	5	4	2	1	15
14	3	2	3	6	4	2	1	11	5
15	3	4
16	3	2	2	3
17	3	3
18	3	2	6
19	3	2	1
20	2	4
21	2	3	2	2	6	4	1	5	6
22	2	2	2	2	6	2	1	14	5
23	3	2	1
24	2	2
25	2	2	3
26	3	2	3
27	3	5
28	3	5
29	3	2	1
30	3	2	1
31	3	3
32	3	2	2
33	3	2
34	3	4	1
35	3	2
36	2	2
37	2	2	2
38	2	2	4
39	3	4	1
40	3	2	1
SUM	111	107	53	23	26	12	5	55	24
AVE	2.775	2.675	1.325	0.575	0.65	0.3	0.125	1.375	0.6	10.4
SD	0.422902	0.997111	1.24838	1.7224	1.09545	0.894427	0	3.937	1.41421	9.89477
SE	0.0668667	0.157657	0.197387	0.272336	0.173205	0.141421	0	0.622495	0.223607	1.85497

## Sheet: LC25 larval data Fluben
NO	1st instar	2nd instar	3rd instar	4th instar	5th instar	6th instar	pre pupa	pupae	Adult	LC25 Fluben
1	2	2	3
2	2	2	1
3	2	2	3
4	3	2	3
5	3	3
6	3	2	1
7	3	2	2
8	3	2	6
9	3	2	1
10	3	2	1
11	3	4	2
12	3	3
13	2	4
14	2	3
15	3	2	1
16	2	2	1
17	3	2	1
18	3	2
19	3	2
20	2	2	1
21	2	2	5	6	4	2	1	12	5
22	2	2	1
23	3	2
24	3	2	3
25	3	2	2
26	3	2	3
27	2	2	5	6	4	1	1	10	4
28	3	2	1
29	3	2
30	3	2
31	3	2	1
32	3	2	1
33	3	2	6	5	4	1	1	9	3
34	3	2
35	3	4	1
36	2	2	1
37	3	4	1
38	2	4	1
39	3	2	1
40	3	3
SUM	108	94	60	17	12	4	3	31	12
AVE	2.7	2.35	1.5	0.425	0.3	0.1	0.075	0.775	0.3	8.525
SD	0.464095	0.699817	1.60203	0.57735	0	0.57735	0	1.52753	1	6.44817
SE	0.0733799	0.110651	0.253303	0.0912871	0	0.0912871	0	0.241523	0.158114	1.01955

## Sheet: LC50 larval data Fluben
NO	1st instar	2nd instar	3rd instar	4th instar	5th instar	6th instar	pre pupa	pupae	Adult	LC50 Fluben
1	3	2	1
2	3	2	1
3	3	2	1
4	3	2	1
5	3	2	1
6	3	2	1
7	3	2
8	3	2	1
9	2	2
10	3	2	3
11	3	2
12	3	2
13	3	2
14	3	2	2
15	3	2	1
16	3	2	1
17	3	4	3	6	3	3	1	11	7
18	3	2	1
19	3	2	2
20	2	2	1
21	3	2
22	2	2	1
23	2	2	1
24	2	2	1
25	3	2
26	3	2	1
27	3	2
28	3	2	2
29	3	2	1
30	3	2	1
31	2	2
32	3	2
33	3	2	1
34	3	2	1
35	3	2
36	3	2	2
37	3	2	1
38	3	2	1
39	3	2	1
40	3	2	1
SUM	114	82	37	6	3	3	1	11	7
AVE	2.85	2.05	0.925	0.15	0.075	0.075	0.025	0.275	0.175	6.6
SD	0.36162	0.316228	0.5914							1.26925
SE	0.0571772	0.05	0.0935085							0.200686
