# Supplementary material for: Lethal and sublethal effects of flubendiamide and spirotetramat against the leaf worm, Spodoptera litura(Fabricius) under laboratory conditions
Source: PeerJ. 2023 Aug 14;11:e15745. doi: 10.7717/peerj.15745 (PMC10434074; doi:10.7717/peerj.15745)
Supplement: Supplemental Information 3 [file peerj-11-15745-s003.xlsx]

## Sheet: LC10 FLUBENDAMIDE
x	n	lx	dx	qx	mx	lxmx	xlxmx						LC10 FLUBENDAMIDE
0	40	1	0	0	0	0	0
1	40	1	0.15	0.15	6	6	6
2	34	0.85	0.225	0.264706	9	7.65	15.3
3	25	0.625	0.2	0.32	8	5	15
4	17	0.425	0.225	0.529412	9	3.825	15.3
5	8	0.2	0.025	0.125	1	0.2	1
6	7	0.175	0	0	1	0.175	1.05
7	6	0.175	0.05	0.285714	1	0.175	1.225
8	5	0.125	0	0	0	0	0
9	5	0.125	0	0	0	0	0
10	5	0.125	0	0	0	0	0
11	5	0.125	0	0	0	0	0
12	5	0.125	0	0	0	0	0
13	5	0.125	0	0	0	0	0
14	5	0.125	0	0	0	0	0
15	5	0.125	0	0	0	0	0
16	5	0.125	0	0	0	0	0
17	5	0.125	0	0	0	0	0
18	5	0.125	0	0	0	0	0
19	5	0.125	0	0	0	0	0
20	5	0.125	0	0	0	0	0
21	5	0.125	0	0	0	0	0
22	5	0.125	0	0	0	0	0
23	5	0.125	0	0	0	0	0
24	5	0.125	0	0	0	0	0
25	5	0.125	0	0	0	0	0
26	5	0.125	0	0	0	0	0
27	5	0.125	0	0	0	0	0
28	5	0.125	0	0	0	0	0
29	5	0.125			0	0	0
30	5	0.125			0	0	0
31	5	0.147059			0	0	0
32	5	0.2			0	0	0
33	5	0.294118
						23.025	54.875
					Ro	23.025
					T	2.38328
					rm	1.31608

## Sheet: LC25 FLUBENDAMIDE
x	n	lx	dx	qx	mx	lxmx	xlxmx						LC25 FLUBENDAMIDE
0	40	1	0	0	0	0	0
1	40	1	0.15	0.15	6	6	6
2	34	0.85	0.45	0.529412	18	15.3	30.6
3	16	0.4	0.075	0.1875	3	1.2	3.6
4	13	0.325	0.2	0.615385	8	2.6	10.4
5	5	0.125	0.025	0.2	1	0.125	0.625
6	4	0.1	0	0	0	0	0
7	4	0.1	0.025	0.25	1	0.1	0.7
8	3	0.075	0	0	0	0	0
9	3	0.075	0	0	0	0	0
10	3	0.075	0	0	0	0	0
11	3	0.075	0	0	0	0	0
12	3	0.075	0	0	0	0	0
13	3	0.075	0	0	0	0	0
14	3	0.075	0	0	0	0	0
15	3	0.075	0	0	0	0	0
16	3	0.075	0	0	0	0	0
17	3	0.075	0	0	0	0	0
18	3	0.075	0	0	0	0	0
19	3	0.075	0	0	0	0	0
20	3	0.075	0	0	0	0	0
21	3	0.075	0	0	0	0	0
22	3	0.075	0	0	0	0	0
23	3	0.075	0	0	0	0	0
24	3	0.075	0	0	0	0	0
25	3	0.075	0	0	0	0	0
26	3	0.075	0	0	0	0	0
27	3	0.075	0	0	0	0	0
28	3	0.075	0	0	0	0	0
29	3	0.075	0	0	0	0	0
30	3	0.075	-0.0132353	-0.176471	0	0	0
31	3	0.0882353	-0.0992647	-1.125	0	0	0
32	3	0.1875	0.0336538	0.179487	1	0.1875	6
33	2	0.153846
						25.5125	57.925
					Ro	25.5125
					T	2.27046
					rm	1.42666

## Sheet: LC50 FLUBENDAMIDE
x	n	lx	dx	qx	mx	lxmx	xlxmx						LC50 FLUBENDAMIDE
0	40	1	0	0	0	0	0
1	40	1	0.275	0.275	1	1	1
2	29	0.725	0.6	0.827586	24	17.4	34.8
3	5	0.125	0.075	0.6	3	0.375	1.125
4	2	0.05	0.025	0.5	1	0.05	0.2
5	1	0.025	0	0	0	0	0
6	1	0.025	0	0	0	0	0
7	1	0.025	0	0	0	0	0
8	1	0.025	0	0	0	0	0
9	1	0.025	0	0	0	0	0
10	1	0.025	0	0	0	0	0
11	1	0.025	0	0	0	0	0
12	1	0.025	0	0	0	0	0
13	1	0.025	0	0	0	0	0
14	1	0.025	0	0	0	0	0
15	1	0.025	0	0	0	0	0
16	1	0.025	0	0	0	0	0
17	1	0.025	0	0	0	0	0
18	1	0.025	0	0	0	0	0
19	1	0.025	0	0	0	0	0
20	1	0.025	0	0	0	0	0
21	1	0.025	0	0	0	0	0
22	1	0.025	0	0	0	0	0
23	1	0.025	0	0	0	0	0
24	1	0.025	0	0	0	0	0
25	1	0.025	0	0	0	0	0
26	1	0.025	0	0	0	0	0
27	1	0.025	0	0	0	0	0
28	1	0.025	0	0	0	0	0
29	1	0.025	0	0	0	0	0
30	1	0.025	0	0	0	0	0
31	1	0.025	0	0	0	0	0
32	1	0.025	0	0	0	0	0
33	1	0.025
						18.825	37.125
					Ro	18.825
					T	1.97211
					rm	1.48835
