# Supplementary material for: Lethal and sublethal effects of flubendiamide and spirotetramat against the leaf worm, Spodoptera litura(Fabricius) under laboratory conditions
Source: PeerJ. 2023 Aug 14;11:e15745. doi: 10.7717/peerj.15745 (PMC10434074; doi:10.7717/peerj.15745)
Supplement: Supplemental Information 4 [file peerj-11-15745-s004.xlsx]

## Sheet: CONTROL
x	n	lx	dx	qx	mx	lxmx	xlxmx							Life table S. litura CTRL
0	40	1	0	0	0	0	0
1	40	1	0	0	0	0	0
2	40	1	0.05	0.05	2	2	4
3	38	0.95	0	0	0	0	0
4	38	0.95	0	0	0	0	0
5	38	0.95	0.025	0.0263158	1	0.95	4.75
6	37	0.925	0	0	0	0	0
7	37	0.925	0.025	0.027027	1	0.925	6.475
8	36	0.9	0	0	0	0	0
9	36	0.9	0	0	0	0	0
10	36	0.9	0	0	0	0	0
11	36	0.9	0	0	0	0	0
12	36	0.9	0.025	0.0277778	1	0.9	10.8
13	35	0.875	0	0	0	0	0
14	35	0.875	0	0	0	0	0
15	35	0.875	0.025	0.0285714	1	0.875	13.125
16	34	0.85	0	0	0	0	0
17	34	0.85	0	0	0	0	0
18	34	0.85	0	0	0	0	0
19	34	0.85	0	0	0	0	0
20	34	0.85	0	0	0	0	0
21	34	0.85	0.05	0.0588235	2	1.7	35.7			mx=ln Ro/T
22	32	0.8	0	0	0	0	0
23	32	0.8	0.1	0.125	4	3.2	73.6
24	28	0.7	0	0	0	0	0
25	28	0.7	0	0	0	0	0
26	28	0.7	0	0	0	0	0
27	28	0.7	0	0	0	0	0
28	28	0.7	0.075	0.107143	3	2.1	58.8
29	25	0.625	0.1	0.16	4	2.5	72.5
31	21	0.525	0.075	0.142857	3	1.575	48.825
32	18	0.45	0.125	0.277778	5	2.25	72
33	13	0.325
						18.975	400.575
					Ro	18.975
					T	21.1107
					rm	0.139414

## Sheet: LC10 SPIRO
x	n	lx	dx	qx	mx	lxmx	xlxmx					LC 10 SPIROTETRAMET
0	40	1	0	0	0	0	0
1	40	1	0	0	0	0	0
2	40	1	0.125	0.125	5	5	10
3	35	0.875	0.075	0.0857143	3	2.625	7.875
4	32	0.8	0.175	0.21875	7	5.6	22.4
5	25	0.625	0	0	0	0	0
6	25	0.625	0.05	0.08	2	1.25	7.5
7	23	0.575	0.025	0.0434783	1	0.575	4.025
8	22	0.55	0	0	0	0	0
9	22	0.55	0	0	0	0	0
10	22	0.55	0	0	0	0	0
11	22	0.55	0	0	0	0	0
12	22	0.55	0	0	0	0	0
13	22	0.55	0	0	0	0	0
14	22	0.55	0.025	0.0454545	1	0.55	7.7
15	21	0.525	0	0	0	0	0
16	21	0.525	0	0	0	0	0
17	21	0.525	0	0	0	0	0
18	21	0.525	0	0	0	0	0
19	21	0.525	0	0	0	0	0
20	21	0.525	0	0	0	0	0
21	21	0.525	0	0	0	0	0
22	21	0.525	0	0	0	0	0
23	21	0.525	0	0	0	0	0
24	21	0.525	0	0	0	0	0
25	21	0.525	0	0	0	0	0
26	21	0.525	0	0	0	0	0
27	21	0.525	0.05	0.0952381	2	1.05	28.35
28	19	0.475	0	0	0	0	0
29	19	0.475	0.05	0.105263	2	0.95	27.55
30	17	0.425	0	0	0	0	0
31	17	0.425	0.05	0.117647	2	0.85	26.35
32	15	0.375	0.05	0.133333	2	0.75	24
33	13	0.325	0.325	1
						19.2	165.75
					Ro	19.2
					T	8.63281
					rm	0.342288

## Sheet: LC 25 SPIRO
x	n	lx	dx	qx	mx	lxmx	xlxmx						LC25 SPIROTETRAMET
0	40	1	0	0	0	0	0
1	40	1	0.025	0.025	1	1	1
2	39	0.975	0.05	0.0512821	2	1.95	3.9
3	37	0.925	0.1	0.108108	4	3.7	11.1
4	33	0.825	0.425	0.515152	17	14.025	56.1
5	16	0.4	0.05	0.125	2	0.8	4
6	14	0.35	0	0	0	0	0
7	14	0.35	0	0	0	0	0
8	14	0.35	0.025	0.0714286	1	0.35	2.8
9	13	0.325	0	0	0	0	0
10	13	0.325	0	0	0	0	0
11	13	0.325	0	0	0	0	0
12	13	0.325	0	0	0	0	0
13	13	0.325	0	0	0	0	0
14	13	0.325	0.025	0.0769231	1	0.325	4.55
15	12	0.3	0	0	0	0	0
16	12	0.3	0	0	0	0	0
17	12	0.3	0	0	0	0	0
18	12	0.3	0	0	0	0	0
19	12	0.3	0	0	0	0	0
20	12	0.3	0	0	0	0	0
21	12	0.3	0	0	0	0	0
22	12	0.3	0	0	0	0	0
23	12	0.3	0	0	0	0	0
24	12	0.3	0	0	0	0	0
25	12	0.3	0	0	0	0	0
26	12	0.3	0	0	0	0	0
27	12	0.3	0	0	0	0	0
28	12	0.3	0	0	0	0	0
29	12	0.3	0.05	0.166667	2	0.6	17.4
30	10	0.25	0	0	0	0	0
31	10	0.25	0	0	0	0	0
32	10	0.25	0.025	0.1	1	0.25	8
33	9	0.225
						23	108.85
					Ro	23
					T	4.73261
					rm	0.66253

## Sheet: LC50 SPIRO
x	n	lx	dx	qx	mx	lxmx	xlxmx					LC50 SPIROTETRAMET
0	40	1	0	0	0	0	0
1	40	1	0.175	0.175	7	7	7
2	33	0.825	0.025	0.030303	1	0.825	1.65
3	32	0.8	0.475	0.59375	19	15.2	45.6
4	13	0.325	0.225	0.692308	9	2.925	11.7
5	4	0.1	0.075	0.75	3	0.3	1.5
6	1	0.025	0.025	1	1	0.025	0.15
						26.275	67.6
					Ro	26.275
					T	2.57279
					rm	1.27046
