# Supplementary material for: Lethal and sublethal effects of flubendiamide and spirotetramat against the leaf worm, Spodoptera litura(Fabricius) under laboratory conditions
Source: PeerJ. 2023 Aug 14;11:e15745. doi: 10.7717/peerj.15745 (PMC10434074; doi:10.7717/peerj.15745)
Supplement: Supplemental Information 5 [file peerj-11-15745-s005.xlsx]

## Sheet: MRGR Spiro
CTRL Spiro									LC10 Spiro									LC25 Spiro									LC50 Spiro
W2	ln W2	W1	ln W1	T	MRGR CTRL				W2	ln W2	W1	ln W1	T	MRGR LC10				W2	ln W2	W1	ln W1	T	MRGR LC25				W2	ln W2	W1	ln W1	T	MRGR LC75
0.399	-0.918794	0.0152	-4.18646	11	0.297061				0.255	-1.36649	0.0156	-4.16048	13	0.214923					#NUM!		#NUM!		#NUM!					#NUM!	0.0071	-4.94766		#NUM!
0.178	-1.72597	0.0052	-5.2591	14	0.252366				0.242	-1.41882	0.007	-4.96185	11	0.322093					#NUM!		#NUM!		#NUM!					#NUM!		#NUM!		#NUM!
0.347	-1.05843	0.0087	-4.74443	11	0.335091					#NUM!		#NUM!		#NUM!				0.346	-1.06132	0.0081	-4.81589	11	0.341325					#NUM!		#NUM!		#NUM!
0.229	-1.47403	0.0064	-5.05146	14	0.25553				0.356	-1.03282	0.0084	-4.77952	12	0.312225				0.286	-1.25176	0.0053	-5.24005	12	0.332357					#NUM!		#NUM!		#NUM!
0.517	-0.659712	0.025	-3.68888	12	0.252431					#NUM!		#NUM!		#NUM!					#NUM!		#NUM!		#NUM!					#NUM!		#NUM!		#NUM!
	#NUM!	0.003	-5.80914		#NUM!				0.342	-1.07294	0.0082	-4.80362	13	0.286975				0.182	-1.70375	0.02	-3.91202	16	0.138017					#NUM!		#NUM!		#NUM!
0.274	-1.29463	0.0215	-3.8397	11	0.23137				0.337	-1.08767	0.0075	-4.89285	15	0.253679					#NUM!		#NUM!		#NUM!					#NUM!		#NUM!		#NUM!
	#NUM!		#NUM!		#NUM!					#NUM!		#NUM!		#NUM!					#NUM!		#NUM!		#NUM!					#NUM!		#NUM!		#NUM!
0.353	-1.04129	0.0034	-5.68398	13	0.35713				0.342	-1.07294	0.0078	-4.85363	19	0.198984				0.274	-1.29463	0.0081	-4.81589	15	0.234751					#NUM!	0.0081	-4.81589		#NUM!
0.182	-1.70375	0.0069	-4.97623	14	0.233749				0.326	-1.12086	0.0271	-3.60822	15	0.165824					#NUM!		#NUM!		#NUM!					#NUM!		#NUM!		#NUM!
0.299	-1.20731	0.02	-3.91202	10	0.270471				0.254	-1.37042	0.0336	-3.39323	12	0.168567					#NUM!		#NUM!		#NUM!					#NUM!		#NUM!		#NUM!
0.375	-0.980829	0.021	-3.86323	11	0.262037				0.301	-1.20065	0.0144	-4.24053	12	0.253324					#NUM!		#NUM!		#NUM!					#NUM!		#NUM!		#NUM!
0.261	-1.34323	0.0152	-4.18646	12	0.236935				0.291	-1.23443	0.0035	-5.65499	14	0.315754				0.277	-1.28374	0.0073	-4.91988	14	0.259725					#NUM!		#NUM!		#NUM!
0.286	-1.25176	0.00338	-5.68988	13	0.341394					#NUM!		#NUM!		#NUM!					#NUM!		#NUM!		#NUM!					#NUM!		#NUM!		#NUM!
0.326	-1.12086	0.0202	-3.90207	10	0.278121					#NUM!	0.0055	-5.20301		#NUM!					#NUM!		#NUM!		#NUM!					#NUM!		#NUM!		#NUM!
	#NUM!	0.0057	-5.16729		#NUM!					#NUM!	0.021	-3.86323		#NUM!					#NUM!		#NUM!		#NUM!					#NUM!		#NUM!		#NUM!
0.271	-1.30564	0.0109	-4.51899	11	0.292123					#NUM!		#NUM!		#NUM!					#NUM!	0.0217	-3.83044		#NUM!					#NUM!		#NUM!		#NUM!
0.294	-1.22418	0.0087	-4.74443	12	0.293355					#NUM!		#NUM!		#NUM!					#NUM!	0.0032	-5.7446		#NUM!					#NUM!	0.0132	-4.32754		#NUM!
0.314	-1.15836	0.0135	-4.30507	11	0.286064				0.254	-1.37042	0.0065	-5.03595	13	0.281964					#NUM!		#NUM!		#NUM!					#NUM!		#NUM!		#NUM!
0.268	-1.31677	0.0156	-4.16048	11	0.25852				0.259	-1.35093	0.0037	-5.59942	14	0.303464					#NUM!		#NUM!		#NUM!					#NUM!		#NUM!		#NUM!
0.354	-1.03846	0.02	-3.91202	11	0.261233					#NUM!	0.0052	-5.2591		#NUM!					#NUM!		#NUM!		#NUM!					#NUM!		#NUM!		#NUM!
0.349	-1.05268	0.0146	-4.22673	11	0.28855					#NUM!		#NUM!		#NUM!					#NUM!		#NUM!		#NUM!					#NUM!		#NUM!		#NUM!
0.342	-1.07294	0.006	-5.116	11	0.36755				0.433	-0.837018	0.0089	-4.7217	14	0.277478					#NUM!		#NUM!		#NUM!					#NUM!	0.0014	-6.57128		#NUM!
0.282	-1.26585	0.0092	-4.68855	11	0.311155					#NUM!		#NUM!		#NUM!					#NUM!		#NUM!		#NUM!					#NUM!		#NUM!		#NUM!
0.337	-1.08767	0.0145	-4.23361	11	0.285994					#NUM!		#NUM!		#NUM!					#NUM!		#NUM!		#NUM!					#NUM!		#NUM!		#NUM!
0.261	-1.34323	0.0255	-3.66908	11	0.21144				0.324	-1.12701	0.0014	-6.57128	13	0.41879					#NUM!		#NUM!		#NUM!					#NUM!		#NUM!		#NUM!
0.376	-0.978166	0.0208	-3.8728	11	0.263149				0.255	-1.36649	0.0201	-3.90704	10	0.254054				0.363	-1.01335	0.008	-4.82831	14	0.272497					#NUM!		#NUM!		#NUM!
0.301	-1.20065	0.0091	-4.69948	11	0.318076				0.316	-1.15201	0.0052	-5.2591	15	0.273806				0.249	-1.3903	0.0142	-4.25451	12	0.238684					#NUM!		#NUM!		#NUM!
0.336	-1.09064	0.0064	-5.05146	15	0.264054				0.363	-1.01335	0.0156	-4.16048	15	0.209809					#NUM!		#NUM!		#NUM!					#NUM!		#NUM!		#NUM!
	#NUM!	0.0115	-4.46541		#NUM!					#NUM!	0.0136	-4.29769		#NUM!					#NUM!		#NUM!		#NUM!					#NUM!		#NUM!		#NUM!
0.269	-1.31304	0.0168	-4.08638	12	0.231111				0.357	-1.03002	0.0165	-4.10439	12	0.256198				0.455	-0.787458	0.0139	-4.27587	13	0.268339							#NUM!		#NUM!
0.33	-1.10866	0.0113	-4.48295	11	0.306754					#NUM!		#NUM!		#NUM!					#NUM!		#NUM!		#NUM!						0.0168	-4.08638		#NUM!
0.363	-1.01335	0.02	-3.91202	12	0.241556					#NUM!		#NUM!		#NUM!					#NUM!	0.0068	-4.99083		#NUM!									#NUM!
	#NUM!	0.0224	-3.79869		#NUM!					#NUM!		#NUM!		#NUM!				0.203	-1.59455	0.0251	-3.68489	12	0.174195
0.378	-0.972861	0.0123	-4.39816	12	0.285441					#NUM!		#NUM!		#NUM!				0.41	-0.891598	0.0147	-4.21991	12	0.277359
	#NUM!		#NUM!		#NUM!					#NUM!		#NUM!		#NUM!				0.293	-1.22758	0.0092	-4.68855	12	0.288414
0.288	-1.24479	0.007	-4.96185	12	0.309754				0.353	-1.04129	0.0143	-4.2475	13	0.246631					#NUM!		#NUM!		#NUM!
0.279	-1.27654	0.0119	-4.43122	13	0.242667				0.281	-1.2694	0.0098	-4.62537	12	0.279664					#NUM!	0.0091	-4.69948		#NUM!
0.271	-1.30564	0.0128	-4.35831	12	0.254389				0.255	-1.36649	0.0052	-5.2591	18	0.216256					#NUM!		#NUM!		#NUM!										Sum
0.296	-1.2174	0.0064	-5.05146	11	0.348551					#NUM!	0.0068	-4.99083		#NUM!				0.381	-0.964956	0.0115	-4.46541	14	0.250032										SD
																																	SE
																							Sum
																							SD
					#NUM!	Sum																	SE
					#NUM!	SD
					#NUM!	SE								#NUM!	Sum
	N=43													#NUM!	SD
														#NUM!	SE
										N=45
			6.55744
							W2= Pupal weight in g
							W1= 3rd instar weight in g
							T= Time duration from 3rd instar to pupae formation
							MRGR=(ln w2-ln w1)/T

## Sheet: MRGR Fluben
LC10 Fluben									LC25 Fluben									LC50 Fluben
W2	ln W2	W1	ln W1	T	MRGR LC25				W2	ln W2	W1	ln W1	T	MRGR LC50				W2	ln W2	W1	ln W1	T	MRGR LC75
	#NUM!		#NUM!		#NUM!					#NUM!		#NUM!		#NUM!					#NUM!		#NUM!		#NUM!
	#NUM!		#NUM!		#NUM!					#NUM!		#NUM!		#NUM!					#NUM!		#NUM!		#NUM!
	#NUM!		#NUM!		#NUM!					#NUM!		#NUM!		#NUM!					#NUM!		#NUM!		#NUM!
	#NUM!		#NUM!		#NUM!					#NUM!		#NUM!		#NUM!					#NUM!		#NUM!		#NUM!
	#NUM!		#NUM!		#NUM!					#NUM!		#NUM!		#NUM!					#NUM!		#NUM!		#NUM!
	#NUM!		#NUM!		#NUM!					#NUM!		#NUM!		#NUM!					#NUM!		#NUM!		#NUM!
0.347	-1.05843	0.0051	-5.27851	15	0.281339					#NUM!		#NUM!		#NUM!					#NUM!		#NUM!		#NUM!
	#NUM!		#NUM!		#NUM!					#NUM!		#NUM!		#NUM!					#NUM!		#NUM!		#NUM!
	#NUM!		#NUM!		#NUM!					#NUM!		#NUM!		#NUM!					#NUM!		#NUM!		#NUM!
	#NUM!		#NUM!		#NUM!					#NUM!		#NUM!		#NUM!					#NUM!		#NUM!		#NUM!
	#NUM!		#NUM!		#NUM!					#NUM!		#NUM!		#NUM!					#NUM!		#NUM!		#NUM!
	#NUM!		#NUM!		#NUM!					#NUM!		#NUM!		#NUM!					#NUM!		#NUM!		#NUM!
0.229	-1.47403	0.0027	-5.9145	13	0.341575					#NUM!		#NUM!		#NUM!					#NUM!		#NUM!		#NUM!
0.237	-1.4397	0.0039	-5.54678	14	0.293363					#NUM!		#NUM!		#NUM!					#NUM!		#NUM!		#NUM!
	#NUM!		#NUM!		#NUM!					#NUM!		#NUM!		#NUM!					#NUM!		#NUM!		#NUM!
	#NUM!	0.0052	-5.2591		#NUM!					#NUM!		#NUM!		#NUM!					#NUM!		#NUM!		#NUM!
	#NUM!		#NUM!		#NUM!					#NUM!		#NUM!		#NUM!				0.346	-1.06132	0.002	-6.21461	14	0.368092
	#NUM!		#NUM!		#NUM!					#NUM!		#NUM!		#NUM!					#NUM!		#NUM!		#NUM!
	#NUM!		#NUM!		#NUM!					#NUM!		#NUM!		#NUM!					#NUM!		#NUM!		#NUM!
	#NUM!		#NUM!		#NUM!					#NUM!		#NUM!		#NUM!					#NUM!		#NUM!		#NUM!
0.299	-1.20731	0.013	-4.34281	14	0.223964				0.299	-1.20731	0.0057	-5.16729	14	0.282856					#NUM!		#NUM!		#NUM!
0.282	-1.26585	0.0032	-5.7446	12	0.37323					#NUM!		#NUM!		#NUM!					#NUM!		#NUM!		#NUM!
										#NUM!		#NUM!		#NUM!					#NUM!		#NUM!		#NUM!
										#NUM!		#NUM!		#NUM!					#NUM!		#NUM!		#NUM!
										#NUM!		#NUM!		#NUM!					#NUM!		#NUM!		#NUM!
										#NUM!		#NUM!		#NUM!					#NUM!		#NUM!		#NUM!
									0.347	-1.05843	0.0052	-5.2591	13	0.323128					#NUM!		#NUM!		#NUM!
										#NUM!		#NUM!		#NUM!					#NUM!		#NUM!		#NUM!
										#NUM!		#NUM!		#NUM!									#NUM!	Sum
										#NUM!		#NUM!		#NUM!									#NUM!	SD
										#NUM!		#NUM!		#NUM!						N=28			#NUM!	SE
										#NUM!		#NUM!		#NUM!						5.29
									0.255	-1.36649	0.0048	-5.33914	12	0.331054
										#NUM!		#NUM!		#NUM!
														#NUM!	Sum
														#NUM!	SD
											N=34			#NUM!	SE
											5.83
					#NUM!	Sum
					#NUM!	SD
	N=46				#NUM!	SE				W2= Pupal weight in g
	6.78									W1= 3rd instar weight in g
										T= time duration from 3rd instar to pupae formation
										MRGR=(ln w2-ln w1)/T

## Sheet: MRGR Spiro 1
CTRL Spiro									LC10 Spiro									LC25 Spiro
W2	ln W2	W1	ln W1	T	MRGR CTRL				W2	ln W2	W1	ln W1	T	MRGR LC10				W2	ln W2	W1	ln W1	T	MRGR LC25
0.399	-0.918794	0.0152	-4.18646	11	0.297061				0.255	-1.36649	0.0156	-4.16048	13	0.214923				0.346	-1.06132	0.0081	-4.81589	11	0.341325
0.178	-1.72597	0.0052	-5.2591	14	0.252366				0.242	-1.41882	0.007	-4.96185	11	0.322093				0.286	-1.25176	0.0053	-5.24005	12	0.332357
0.347	-1.05843	0.0087	-4.74443	11	0.335091				0.356	-1.03282	0.0084	-4.77952	12	0.312225				0.182	-1.70375	0.02	-3.91202	16	0.138017
0.229	-1.47403	0.0064	-5.05146	14	0.25553				0.342	-1.07294	0.0082	-4.80362	13	0.286975				0.274	-1.29463	0.0081	-4.81589	15	0.234751
0.517	-0.659712	0.025	-3.68888	12	0.252431				0.337	-1.08767	0.0075	-4.89285	15	0.253679				0.277	-1.28374	0.0073	-4.91988	14	0.259725
0.274	-1.29463	0.0215	-3.8397	11	0.23137				0.342	-1.07294	0.0078	-4.85363	19	0.198984				0.363	-1.01335	0.008	-4.82831	14	0.272497
0.353	-1.04129	0.0034	-5.68398	13	0.35713				0.326	-1.12086	0.0271	-3.60822	15	0.165824				0.249	-1.3903	0.0142	-4.25451	12	0.238684
0.182	-1.70375	0.0069	-4.97623	14	0.233749				0.254	-1.37042	0.0336	-3.39323	12	0.168567				0.455	-0.787458	0.0139	-4.27587	13	0.268339
0.299	-1.20731	0.02	-3.91202	10	0.270471				0.301	-1.20065	0.0144	-4.24053	12	0.253324				0.203	-1.59455	0.0251	-3.68489	12	0.174195
0.375	-0.980829	0.021	-3.86323	11	0.262037				0.291	-1.23443	0.0035	-5.65499	14	0.315754				0.41	-0.891598	0.0147	-4.21991	12	0.277359
0.261	-1.34323	0.0152	-4.18646	12	0.236935				0.254	-1.37042	0.0065	-5.03595	13	0.281964				0.293	-1.22758	0.0092	-4.68855	12	0.288414
0.286	-1.25176	0.00338	-5.68988	13	0.341394				0.259	-1.35093	0.0037	-5.59942	14	0.303464				0.381	-0.964956	0.0115	-4.46541	14	0.250032
0.326	-1.12086	0.0202	-3.90207	10	0.278121				0.433	-0.837018	0.0089	-4.7217	14	0.277478									3.0757	SUM
0.271	-1.30564	0.0109	-4.51899	11	0.292123				0.324	-1.12701	0.0014	-6.57128	13	0.41879									0.783897	SD
0.294	-1.22418	0.0087	-4.74443	12	0.293355				0.255	-1.36649	0.0201	-3.90704	10	0.254054					N=12				0.226292	SE
0.314	-1.15836	0.0135	-4.30507	11	0.286064				0.316	-1.15201	0.0052	-5.2591	15	0.273806
0.268	-1.31677	0.0156	-4.16048	11	0.25852				0.363	-1.01335	0.0156	-4.16048	15	0.209809
0.354	-1.03846	0.02	-3.91202	11	0.261233				0.357	-1.03002	0.0165	-4.10439	12	0.256198
0.349	-1.05268	0.0146	-4.22673	11	0.28855				0.353	-1.04129	0.0143	-4.2475	13	0.246631
0.342	-1.07294	0.006	-5.116	11	0.36755				0.281	-1.2694	0.0098	-4.62537	12	0.279664
0.282	-1.26585	0.0092	-4.68855	11	0.311155				0.255	-1.36649	0.0052	-5.2591	18	0.216256
0.337	-1.08767	0.0145	-4.23361	11	0.285994									5.51046	SUM
0.261	-1.34323	0.0255	-3.66908	11	0.21144									1.1203	SD
0.376	-0.978166	0.0208	-3.8728	11	0.263149					N=21				0.24447	SE
0.301	-1.20065	0.0091	-4.69948	11	0.318076
0.336	-1.09064	0.0064	-5.05146	15	0.264054
0.269	-1.31304	0.0168	-4.08638	12	0.231111
0.33	-1.10866	0.0113	-4.48295	11	0.306754
0.363	-1.01335	0.02	-3.91202	12	0.241556
0.378	-0.972861	0.0123	-4.39816	12	0.285441
0.288	-1.24479	0.007	-4.96185	12	0.309754
0.279	-1.27654	0.0119	-4.43122	13	0.242667
0.271	-1.30564	0.0128	-4.35831	12	0.254389
0.296	-1.2174	0.0064	-5.05146	11	0.348551
					9.52517	SUM
	N=34				1.56317	SD
					0.268082	SE
										W2= Pupal weight in g
										W1= 3rd instar weight in g
										T= Time duration from 3rd instar to pupae formation
										MRGR=(ln w2-ln w1)/T

## Sheet: MRGR Fluben 2
LC10 Fluben									LC25 Fluben									LC50 Fluben
W2	ln W2	W1	ln W1	T	MRGR LC10				W2	ln W2	W1	ln W1	T	MRGR LC25				W2	ln W2	W1	ln W1	T	MRGR LC50
0.347	-1.05843	0.0051	-5.27851	15	0.281339				0.299	-1.20731	0.0057	-5.16729	14	0.282856				0.346	-1.06132	0.002	-6.21461	14	0.368092
0.229	-1.47403	0.0027	-5.9145	13	0.341575				0.347	-1.05843	0.0052	-5.2591	13	0.323128									0.368092	sum
0.237	-1.4397	0.0039	-5.54678	14	0.293363				0.255	-1.36649	0.0048	-5.33914	12	0.331054					N=1				0	SD
0.299	-1.20731	0.013	-4.34281	14	0.223964									0.937038	sum								0	SE
0.282	-1.26585	0.0032	-5.7446	12	0.37323									0.313058	SD
					1.51347	sum				N=3				0.180744	SE
	N=5				0.496966	SD
					0.22225	SE
								W2= Pupal weight in g
								W1= 3rd instar weight in g
								T= Time duration from 3rd instar to pupae formation
								MRGR=(ln w2-ln w1)/T
